# Supplementary material for: The fundamental relation between electrohelicity and molecular optical activity
Source: Royal Society of Chemistry journal article supplement (doi:10.1039/d3cp01343j), 2023-01-01
Supplement: d3cp01343j1.pdf [file d3cp01343j1.pdf]

Electronic Supplementary Information for:  
The fundamental relation between  
electrohelicity and molecular optical activity

Marc H. Garner\* and Clemence Corminboeuf

*Laboratory for Computational Molecular Design, Institute of Chemical Sciences and  
Engineering, Ecole Polytechnique federale de Lausanne (EPFL), 1015 Lausanne,  
Switzerland.*

E-mail: [marc.garner@epfl.ch](mailto:marc.garner@epfl.ch)

## Note on units

In the Gaussian program,<sup>1</sup> the electric and magnetic transition dipoles are reported in atomic units while the rotatory strengths are reported in cgs units. The following unit conversions were applied.<sup>2,3</sup>

Electric transition dipole moments calculated in velocity-gauge are given in bohr-electron  $\times$  hartree. This is converted to dipole length units by dividing with the electronic transition energy, and then to cgs units by multiplying with  $2.541746 \times 10^{-18}$  esu cm.<sup>3,4</sup>

Magnetic transition dipole moments are given in bohr-magnetons. This is converted to cgs units by multiplying with  $9.274 \times 10^{-21}$  erg/Gauss.<sup>3,4</sup>

## Additional figures

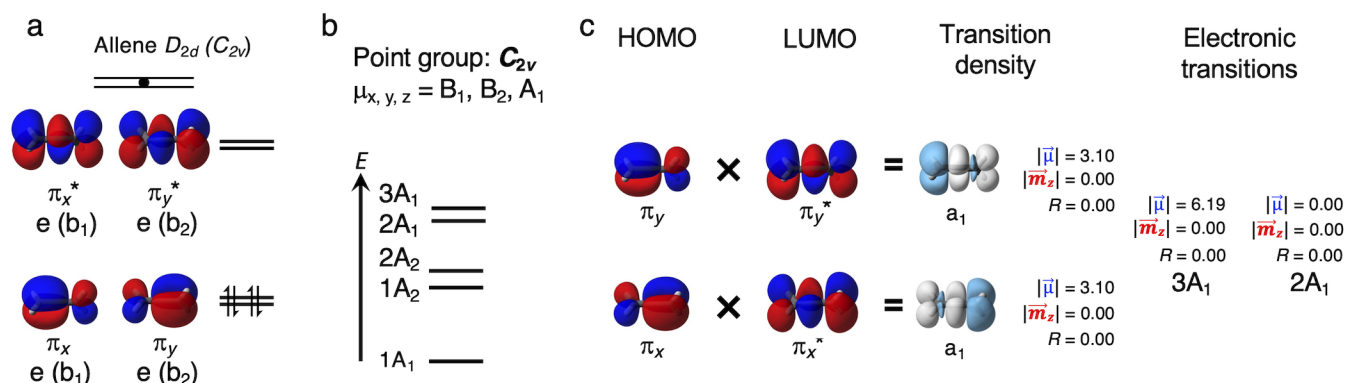

Figure S1: Allene described in  $C_{2v}$  symmetry. a) Frontier MOs. b) Diagram of electronic transitions. c) Direct products of frontier  $\pi$ -MOs.  $\mu$  is in  $10^{-18}$  esu-cm.

|                       | Allene (90°)                                                                                 | Allene (60°)                                                                                  | Cycloallene1                                               | Cycloallene2                                               | Cycloallene3                                               | Cycloallene4                                                                                  |
|-----------------------|----------------------------------------------------------------------------------------------|-----------------------------------------------------------------------------------------------|------------------------------------------------------------|------------------------------------------------------------|------------------------------------------------------------|-----------------------------------------------------------------------------------------------|
| $\pi_M^*$             | <br>2.157 eV                                                                                 | <br>2.992 eV                                                                                  | <br>3.090 eV                                               | <br>2.825 eV                                               | <br>2.755 eV                                               | <br>2.272 eV                                                                                  |
| $\pi_P^*$             | <br>2.157 eV                                                                                 | <br>1.179 eV                                                                                  | <br>0.607 eV                                               | <br>1.357 eV                                               | <br>1.827 eV                                               | <br>2.126 eV                                                                                  |
| $\pi_M$               | <br>-9.600 eV                                                                                | <br>-8.728 eV                                                                                 | <br>-8.210 eV                                              | <br>-8.295 eV                                              | <br>-8.495 eV                                              | <br>-8.708 eV                                                                                 |
| $\pi_P$               | <br>-9.600 eV                                                                                | <br>-10.399 eV                                                                                | <br>-9.461 eV                                              | <br>-9.338 eV                                              | <br>-9.139 eV                                              | <br>-8.938 eV                                                                                 |
| <b>2B<sub>1</sub></b> | 47% $\pi_M \rightarrow \pi_M^*$<br>47% $\pi_P \rightarrow \pi_P^*$<br>$f = 1.199$ $R = 0.00$ | 56% $\pi_M \rightarrow \pi_M^*$<br>$f = 1.040$ $R = 112$                                      | 51% $\pi_M \rightarrow \pi_M^*$<br>$f = 0.280$ $R = 245$   | 63% $\pi_M \rightarrow \pi_M^*$<br>$f = 0.481$ $R = 142$   | 59% $\pi_M \rightarrow \pi_M^*$<br>$f = 0.539$ $R = 156$   | 49% $\pi_M \rightarrow \pi_M^*$<br>44% $\pi_P \rightarrow \pi_P^*$<br>$f = 0.610$ $R = -25.7$ |
| <b>3A</b>             | 49% $\pi_P \rightarrow \pi_M^*$<br>49% $\pi_M \rightarrow \pi_P^*$<br>$f = 0.000$ $R = 0.00$ | 96% $\pi_P \rightarrow \pi_M^*$<br>$f = 0.003$ $R = 16.6$                                     | n/a                                                        | 78% $\pi_P \rightarrow \pi_M^*$<br>$f = 0.002$ $R = -12.4$ | 55% $\pi_P \rightarrow \pi_M^*$<br>$f = 0.016$ $R = -16.5$ | 69% $\pi_P \rightarrow \pi_M^*$<br>$f = 0.017$ $R = -17.4$                                    |
| <b>2A</b>             | 50% $\pi_M \rightarrow \pi_P^*$<br>50% $\pi_P \rightarrow \pi_M^*$<br>$f = 0.000$ $R = 0.00$ | 98% $\pi_M \rightarrow \pi_P^*$<br>$f = 0.000$ $R = 0.00$                                     | 98% $\pi_M \rightarrow \pi_P^*$<br>$f = 0.013$ $R = 12.5$  | 96% $\pi_M \rightarrow \pi_P^*$<br>$f = 0.007$ $R = 1.84$  | 91% $\pi_M \rightarrow \pi_P^*$<br>$f = 0.006$ $R = 0.79$  | 71% $\pi_M \rightarrow \pi_P^*$<br>$f = 0.001$ $R = 2.02$                                     |
| <b>1B<sub>1</sub></b> | 50% $\pi_P \rightarrow \pi_P^*$<br>50% $\pi_M \rightarrow \pi_M^*$<br>$f = 0.000$ $R = 0.00$ | 59% $\pi_P \rightarrow \pi_P^*$<br>40% $\pi_M \rightarrow \pi_M^*$<br>$f = 0.001$ $R = -18.2$ | 84% $\pi_P \rightarrow \pi_P^*$<br>$f = 0.032$ $R = -80.5$ | 67% $\pi_P \rightarrow \pi_P^*$<br>$f = 0.014$ $R = -76.2$ | 62% $\pi_P \rightarrow \pi_P^*$<br>$f = 0.008$ $R = -59.9$ | 51% $\pi_P \rightarrow \pi_P^*$<br>43% $\pi_M \rightarrow \pi_M^*$<br>$f = 0.000$ $R = -3.73$ |

Figure S2: Overview of the  $\pi - \pi^*$  transitions of allene and cycloallenes with their MO contributions, oscillator strengths, and rotatory strengths listed. Only MO contributions over 40% are shown. Note that the transitions are not sorted by energy.

|                       | Allene                                                                                     | 1,3-Dimethylallene                                                                          | <i>R</i> -1,3-diethylallene<br>(+119°)                                                      | <i>R</i> -1,3-diethylallene<br>(-119°)                                                       | Ethylallene                                              | 1,1-Diethylallene                                        |
|-----------------------|--------------------------------------------------------------------------------------------|---------------------------------------------------------------------------------------------|---------------------------------------------------------------------------------------------|----------------------------------------------------------------------------------------------|----------------------------------------------------------|----------------------------------------------------------|
| $\pi_M^*$             | <br>2.157 eV                                                                               | <br>2.446 eV                                                                                | <br>2.462 eV                                                                                | <br>2.296 eV                                                                                 | <br>2.401 eV                                             | <br>2.559 eV                                             |
| $\pi_P^*$             | <br>2.157 eV                                                                               | <br>2.489 eV                                                                                | <br>2.344 eV                                                                                | <br>2.505 eV                                                                                 | <br>2.198 eV                                             | <br>2.464 eV                                             |
| $\pi_M$               | <br>-9.600 eV                                                                              | <br>-8.929 eV                                                                               | <br>-8.887 eV                                                                               | <br>-8.911 eV                                                                                | <br>-9.059 eV                                            | <br>-8.678 eV                                            |
| $\pi_P$               | <br>-9.600 eV                                                                              | <br>-8.930 eV                                                                               | <br>-8.914 eV                                                                               | <br>-8.883 eV                                                                                | <br>-9.395 eV                                            | <br>-9.219 eV                                            |
| <b>2B<sub>1</sub></b> | 47% $\pi_M \rightarrow \pi_M^*$<br>47% $\pi_P \rightarrow \pi_P^*$<br>$f = 1.199$ R = 0.00 | 49% $\pi_M \rightarrow \pi_M^*$<br>41% $\pi_P \rightarrow \pi_P^*$<br>$f = 1.253$ R = 55.4  | 47% $\pi_M \rightarrow \pi_M^*$<br>47% $\pi_P \rightarrow \pi_P^*$<br>$f = 1.472$ R = 141   | 49% $\pi_M \rightarrow \pi_M^*$<br>43% $\pi_P \rightarrow \pi_P^*$<br>$f = 1.442$ R = -81.39 | 50% $\pi_P \rightarrow \pi_P^*$<br>$f = 1.295$ R = 35.4  | 62% $\pi_P \rightarrow \pi_P^*$<br>$f = 1.273$ R = 82.2  |
| <b>3A</b>             | 49% $\pi_P \rightarrow \pi_M^*$<br>49% $\pi_M \rightarrow \pi_P^*$<br>$f = 0.000$ R = 0.00 | 49% $\pi_P \rightarrow \pi_M^*$<br>49% $\pi_M \rightarrow \pi_P^*$<br>$f = 0.000$ R = 1.94  | 51% $\pi_P \rightarrow \pi_M^*$<br>46% $\pi_M \rightarrow \pi_P^*$<br>$f = 0.001$ R = 6.38  | 46% $\pi_P \rightarrow \pi_M^*$<br>51% $\pi_M \rightarrow \pi_P^*$<br>$f = 0.000$ R = 2.43   | 87% $\pi_P \rightarrow \pi_M^*$<br>$f = 0.000$ R = 2.50  | 78% $\pi_P \rightarrow \pi_M^*$<br>$f = 0.000$ R = 2.00  |
| <b>2A</b>             | 50% $\pi_M \rightarrow \pi_P^*$<br>50% $\pi_P \rightarrow \pi_M^*$<br>$f = 0.000$ R = 0.00 | 47% $\pi_M \rightarrow \pi_P^*$<br>48% $\pi_P \rightarrow \pi_M^*$<br>$f = 0.000$ R = -0.15 | 47% $\pi_M \rightarrow \pi_P^*$<br>47% $\pi_P \rightarrow \pi_M^*$<br>$f = 0.000$ R = 0.27  | 45% $\pi_M \rightarrow \pi_P^*$<br>48% $\pi_P \rightarrow \pi_M^*$<br>$f = 0.000$ R = 0.03   | 87% $\pi_M \rightarrow \pi_P^*$<br>$f = 0.000$ R = -3.49 | 81% $\pi_M \rightarrow \pi_P^*$<br>$f = 0.000$ R = -1.16 |
| <b>1B<sub>1</sub></b> | 50% $\pi_P \rightarrow \pi_P^*$<br>50% $\pi_M \rightarrow \pi_M^*$<br>$f = 0.000$ R = 0.00 | 47% $\pi_P \rightarrow \pi_P^*$<br>47% $\pi_M \rightarrow \pi_M^*$<br>$f = 0.000$ R = 2.27  | 47% $\pi_P \rightarrow \pi_P^*$<br>47% $\pi_M \rightarrow \pi_M^*$<br>$f = 0.000$ R = -4.49 | 47% $\pi_P \rightarrow \pi_P^*$<br>46% $\pi_M \rightarrow \pi_M^*$<br>$f = 0.000$ R = 9.04   | 53% $\pi_M \rightarrow \pi_M^*$<br>$f = 0.000$ R = 1.55  | 65% $\pi_M \rightarrow \pi_M^*$<br>$f = 0.148$ R = 3.17  |

Figure S3: Overview of the  $\pi - \pi^*$  transitions of substituted allenes with their MO contributions, oscillator strengths, and rotatory strengths listed. Only MO contributions over 40% are shown. *R*-1,3-diethylallene is shown in its two optimized  $C_2$  symmetry conformers with both C=C-C-C ethyl dihedral angles at  $\pm 119^\circ$ . Note that the transitions are not sorted by energy.

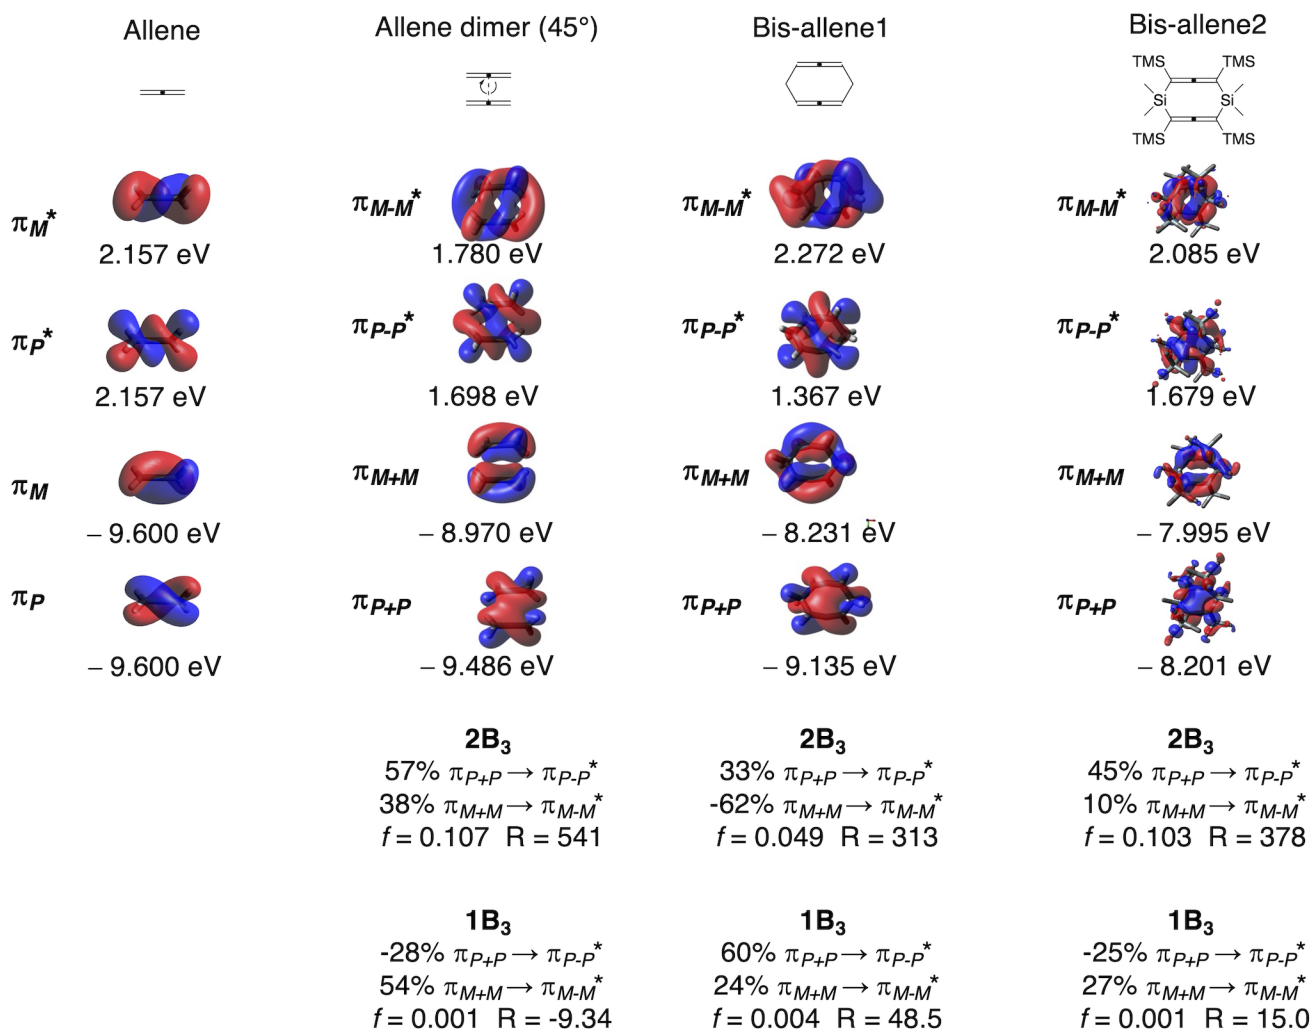

Figure S4: Overview of the B<sub>3</sub> transitions of the allene dimer and bis-allenes with their MO contributions, oscillator strengths, and rotatory strengths listed. Hydrogens are omitted on Bis-allene2 for clarity.

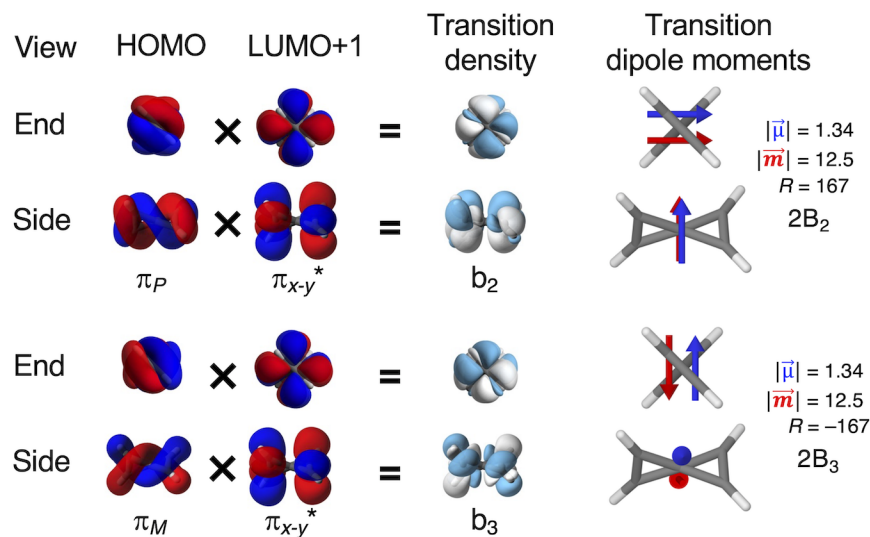

Figure S5: Direct products of the two HOMO  $\rightarrow$  LUMO+1 transitions of spiropentadiene in  $D_2$  symmetry viewed from end and side of the molecule. The electric (blue) and magnetic (red) transition dipole moments, and the rotatory strengths is provided for the electronic transitions (right column).  $\vec{\mu}$  is given in  $10^{-18}$  esu·cm.  $\vec{m}$  is given in  $10^{-21}$  erg/G.  $R$  is given in  $10^{-40}$  erg·esu·cm/G.

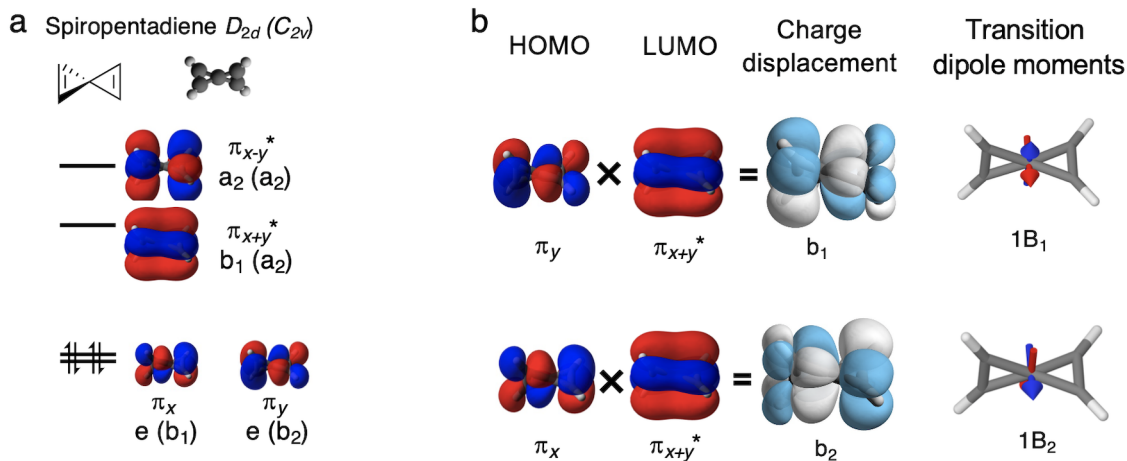

Figure S6: spiropentadiene described in  $C_{2v}$  symmetry. a) Frontier MOs. b) Diagram of electronic transitions. c) Direct products of frontier  $\pi$ -MOs.

|                       | Spiropentadiene (90°)                                                                           | Spiropentadiene (80°)                                                                               | Cyclo-spde1                                                                                          | Cyclo-spde2                                                                                          | Cyclo-spde3                                                                                         | Cyclo-spde4                                                                                         |
|-----------------------|-------------------------------------------------------------------------------------------------|-----------------------------------------------------------------------------------------------------|------------------------------------------------------------------------------------------------------|------------------------------------------------------------------------------------------------------|-----------------------------------------------------------------------------------------------------|-----------------------------------------------------------------------------------------------------|
| $\pi_{x-y}^*$         | <br>2.601 eV   | <br>2.565 eV       | <br>2.918 eV        | <br>2.472 eV       | <br>2.653 eV     | <br>2.652 eV     |
| $\pi_{x+y}^*$         | <br>1.603 eV   | <br>1.625 eV       | <br>1.948 eV        | <br>1.654 eV       | <br>1.878 eV     | <br>1.908 eV     |
| $\pi_M$               | <br>-8.263 eV  | <br>-7.922 eV      | <br>-7.069 eV       | <br>-7.285 eV      | <br>-7.454 eV    | <br>-7.545 eV    |
| $\pi_P$               | <br>-8.263 eV | <br>-8.574 eV     | <br>-8.215 eV      | <br>-8.104 eV     | <br>-7.868 eV   | <br>-7.835 eV   |
| <b>2B<sub>2</sub></b> | 91% $\pi_P \rightarrow \pi_{x-y}^*$<br>$f = 0.039$ R = 167                                      | 93% $\pi_P \rightarrow \pi_{x-y}^*$<br>$f = 0.032$ R = 147                                          | 93% $\pi_P \rightarrow \pi_{x-y}^*$<br>$f = 0.025$ R = 128                                           | 92% $\pi_P \rightarrow \pi_{x-y}^*$<br>$f = 0.040$ R = 152                                           | 84% $\pi_P \rightarrow \pi_{x-y}^*$<br>$f = 0.051$ R = 199                                          | 86% $\pi_P \rightarrow \pi_{x-y}^*$<br>$f = 0.042$ R = 200                                          |
| <b>1B<sub>3</sub></b> | 91% $\pi_M \rightarrow \pi_{x-y}^*$<br>$f = 0.039$ R = -167                                     | -27% $\pi_P \rightarrow \pi_{x+y}^*$<br>70% $\pi_M \rightarrow \pi_{x-y}^*$<br>$f = 0.050$ R = -159 | -13% $\pi_P \rightarrow \pi_{x+y}^*$<br>84% $\pi_M \rightarrow \pi_{x-y}^*$<br>$f = 0.007$ R = -73.5 | 48% $\pi_P \rightarrow \pi_{x+y}^*$<br>49% $\pi_M \rightarrow \pi_{x-y}^*$<br>$f = 0.084$ R = -187   | -16% $\pi_P \rightarrow \pi_{x+y}^*$<br>73% $\pi_M \rightarrow \pi_{x-y}^*$<br>$f = 0.080$ R = -230 | 12% $\pi_P \rightarrow \pi_{x+y}^*$<br>77% $\pi_M \rightarrow \pi_{x-y}^*$<br>$f = 0.087$ R = -233  |
| <b>1B<sub>3</sub></b> | 92% $\pi_P \rightarrow \pi_{x+y}^*$<br>$f = 0.008$ R = 13.0                                     | 70% $\pi_P \rightarrow \pi_{x+y}^*$<br>27% $\pi_M \rightarrow \pi_{x-y}^*$<br>$f = 0.002$ R = 20.5  | 84% $\pi_P \rightarrow \pi_{x+y}^*$<br>14% $\pi_M \rightarrow \pi_{x-y}^*$<br>$f = 0.055$ R = -66.9  | 49% $\pi_P \rightarrow \pi_{x+y}^*$<br>-47% $\pi_M \rightarrow \pi_{x-y}^*$<br>$f = 0.000$ R = -5.72 | 80% $\pi_P \rightarrow \pi_{x+y}^*$<br>13% $\pi_M \rightarrow \pi_{x-y}^*$<br>$f = 0.008$ R = 25.9  | 83% $\pi_P \rightarrow \pi_{x+y}^*$<br>-11% $\pi_M \rightarrow \pi_{x-y}^*$<br>$f = 0.011$ R = 27.1 |
| <b>1B<sub>2</sub></b> | 92% $\pi_M \rightarrow \pi_{x+y}^*$<br>$f = 0.008$ R = -13.0                                    | 95% $\pi_M \rightarrow \pi_{x+y}^*$<br>$f = 0.008$ R = -2.09                                        | 96% $\pi_M \rightarrow \pi_{x+y}^*$<br>$f = 0.022$ R = -15.6                                         | 95% $\pi_M \rightarrow \pi_{x+y}^*$<br>$f = 0.017$ R = -3.64                                         | 93% $\pi_M \rightarrow \pi_{x+y}^*$<br>$f = 0.015$ R = -2.69                                        | 92% $\pi_M \rightarrow \pi_{x+y}^*$<br>$f = 0.010$ R = -6.48                                        |

Figure S7: Overview of the  $\pi - \pi^*$  transitions of spiropentadiene and cyclo-spiropentadienes (cyclo-spde) with their MO contributions, oscillator strengths, and rotatory strengths listed.

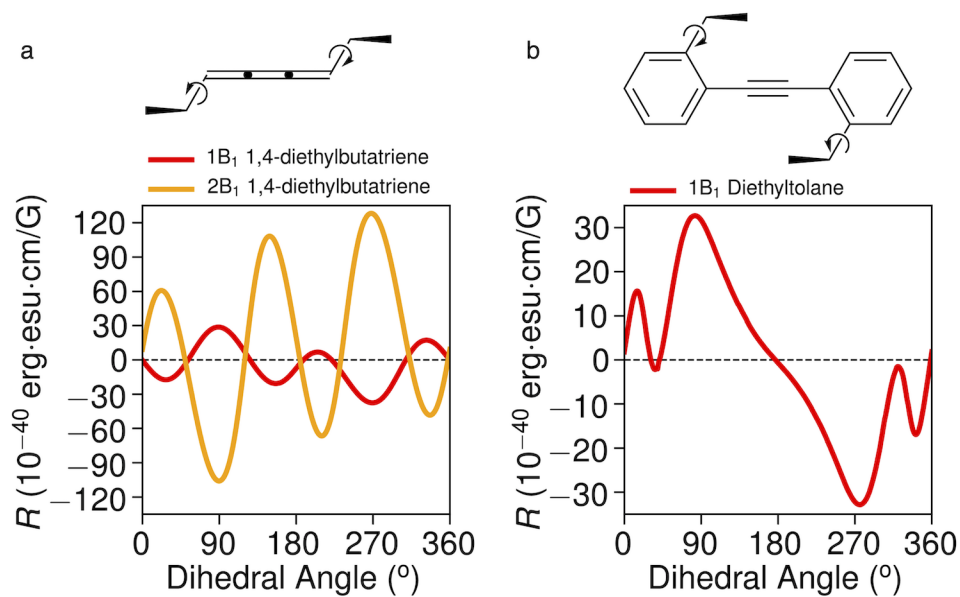

Figure S8: Rotatory strengths computed as function of ethyl substituent torsion in 1,4-diethylbutatriene (a) and bis(2-ethyl)-tolane (b), similarly to 1,3-diethylallene as computed in the manuscript. The  $\pi - \pi^*$  transitions are equivalent to those explored for butatriene and toluene in the manuscript in Figure 7 and 8, which have  $B_1$  symmetry, but are of lower symmetry in the substituted molecules.



## References

- (1) Frisch, M. J.; Trucks, G. W.; Schlegel, H. B.; Scuseria, G. E.; Robb, M. A.; Cheeseman, J. R.; Scalmani, G.; Barone, V.; Petersson, G. A.; Nakatsuji, H. et al. Gaussian 16 Revision A.03. 2016; Gaussian Inc. Wallingford CT.
- (2) Mohr, P. J.; Taylor, B. N.; Newell, D. B. CODATA recommended values of the fundamental physical constants: 2010. *Rev. Mod. Phys.* **2012**, *84*, 1527–1605.
- (3) Constants | Gaussian.com. <https://gaussian.com/constants/>.
- (4) Autschbach, J. Computing chiroptical properties with first-principles theoretical methods: Background and illustrative examples. *Chirality* **2009**, *21*, E116–E152.
